# Supplementary material
Source: publisher figshare collection journal article supplement (https://springernature.figshare.com/ndownloader/files/21835260)
Supplement: Supplementary file 1 [file 21835260]

## Survey Methodology

Following Eysenbach G, 2004, Improving the Quality of Web Surveys: The Checklist for Reporting Results of Internet E-Surveys (CHERRIES), Journal of Medical Internet Research, Jul-Sep; 6(3): e34.

| <b>Checklist for Reporting Results of Internet E-Surveys (CHERRIES)</b> |                                                                        |                                                                                                                                                                                                                                                                                                                                                                                                                                                                                                                                                                                                                                                                                                                                                                                                                   |
|-------------------------------------------------------------------------|------------------------------------------------------------------------|-------------------------------------------------------------------------------------------------------------------------------------------------------------------------------------------------------------------------------------------------------------------------------------------------------------------------------------------------------------------------------------------------------------------------------------------------------------------------------------------------------------------------------------------------------------------------------------------------------------------------------------------------------------------------------------------------------------------------------------------------------------------------------------------------------------------|
| <b>Item Category</b>                                                    | <b>Checklist Item</b>                                                  | <b>Explanation</b>                                                                                                                                                                                                                                                                                                                                                                                                                                                                                                                                                                                                                                                                                                                                                                                                |
| <b>Design</b>                                                           | Describe survey design                                                 | Target population: national random sample of adults (ages 18-65) in Germany, representative of age, gender, and region (n=1,102, confidence limit=95%, margin of error=3%). The survey drew upon participants from a large web-based panel (~650,000 participants) held by Survey Sampling International (SSI). Participant recruitment followed a three-stage randomization process: first, participants are randomly selected from SSI panels and invited to take a survey; second, participants are combined with others into SSI's Dynamix sampling platform and respond to randomly selected profiling questions; and third, prospective participants are then randomly assigned to a survey. All responses were anonymous.                                                                                  |
|                                                                         | IRB (Institutional Review Board) approval and informed consent process |                                                                                                                                                                                                                                                                                                                                                                                                                                                                                                                                                                                                                                                                                                                                                                                                                   |
|                                                                         | IRB approval                                                           | Ethics approval was obtained by the University of Melbourne, School of Engineering Human Ethics Advisory Group, application 1646894, on May 9, 2016.                                                                                                                                                                                                                                                                                                                                                                                                                                                                                                                                                                                                                                                              |
|                                                                         | Informed consent                                                       | Participants had already provided informed consent as part of the SSI web-based panel. For this survey, participants were given the following introduction: aims of the study; principal researcher name, affiliation, and contact information; human ethics approval; length of survey (less than 15 minutes to complete); assurance that participation is completely voluntary and that all data provided are confidential; assurance that participants can withdraw at any time; outputs of research (findings will be provided through journal articles and website, free of charge); university human ethics contact information; and a specific question to indicate consent: "If you would like to participate in this project, please click the next button to proceed ('Go To Survey')." Data protection |
|                                                                         | Data protection                                                        | Selected survey software and servers were used to ensure data protection. No personal information was linked to the survey results. The dataset (without any identifying information) is kept on password protected computers.                                                                                                                                                                                                                                                                                                                                                                                                                                                                                                                                                                                    |

## Development and pre-testing

### Development and testing

The survey instrument was a 43-item questionnaire, developed and tested over a three-year period, including cognitive testing with 10 individuals and piloting with over 100 individuals, before full implementation in March 2019. The survey was implemented in German.

## Recruitment process and description of the sample having access to the questionnaire

The survey invitation is an open invitation, rather than a direct invite, to the pool of panelists available at the time. The pool is filtered to achieve a representative sample through a set of initial questions for basic demographic characteristics. SSI uses multiple sources to achieve a sample blend that is characteristic of the population, and response quotas for specific variables (e.g., age, gender, and region) ensure proportions that are representative of the population. (See electronic supplementary material: "SSI Survey Methodologies.") Closed survey (only SSI participants), general population, random sample nationally representative of demographics.

### Open survey versus closed survey Contact mode

The survey provider, SSI, provided an open invitation to potential participants. The survey targeted the general population rather than a specific cohort.

### Advertising the survey

An open invitation was issued to randomly selected members of the web-based panel. The survey was not advertised.

## Survey administration

### Web/E-mail

The survey was web-based, with multiple choice and open format answers. All responses were anonymous and collected through the online survey platform and stored on local password protected servers.

### Context Mandatory/voluntary

SSI is a survey research company and online panel provider. Voluntary. Prospective participants were randomly invited to the survey.

### Incentives

Respondents were provided incentives for their participation by the panel provider, SSI, with points that can be redeemed for money or reward programs.

### Time/Date Randomization of items or questionnaires Adaptive questioning

Data were collected within one week in March 2019. To prevent biases in response, five sets of questions were randomized for their multiple-choice items. Eight questions were conditionally displayed based on responses to other items.

### Number of Items

The survey contained 43 questions. Each page contained one question with multiple choice and open format response categories.

### Number of screens (pages)

Overall, 44 to 52 pages were presented (including the introductory page), depending on responses to conditional items.

### Completeness check

All questions were required to be completed. All questions provided non-response options such as "neutral/not sure" and "decline to answer." Only completed surveys were included for analysis.

### Review step

Respondents were allowed one attempt per question, once they click "next" to review the next question; they are not allowed to go back to the previous questions or answers.

## Response rates

Unique site visitor

Survey completion rate: 83%. Number of initial responses: 1,333; number of drop outs: 49; number of screen outs: 102; number of completes: 1,102; Panel size: ~650,000.

Each respondent goes through stringent verification of identity upon signing up on SSI panel (including name, contact details, and IP). Once opt-in process is completed, each respondent is tagged with unique panel ID.

View rate (Ratio of unique survey visitors/unique site visitors)

not applicable

Participation rate (Ratio of unique visitors who agreed to participate/unique first survey page visitors)

SSI respondents are invited to survey through general population random selection. Unique clicks or visitors to the first page of the survey can be those who complete survey, drop out, or screen out.

Completion rate (Ratio of users who finished the survey/users who agreed to participate)

Germany 83% (1,333 initial; 49 drop outs; 102 screen out; 1,102 completes).

## Preventing multiple entries from the same individual

Cookies used  
IP check

not used

SSI programming software and sampling tool, Dynamix, controls the traffic and ensures unique entries. Using unique Panel ID and IP, each respondent can attempt the survey only once.

Log file analysis  
Registration

not used

This is a closed survey for SSI respondents only. Survey invite is mailed specifically to the e-mail address used upon joining survey and verified.

## Analysis

Handling of incomplete questionnaires  
Questionnaires submitted with an atypical timestamp

Only completed questionnaires were included in the final dataset for analysis.

Minimum survey completion time was 5 minutes; average was 10 minutes. A small number of respondents were omitted for completing the items too quickly.

Statistical correction

All demographic subgroups obtained statistically valid numbers to ensure a national representativeness.
